# Supplementary material
Source: HighWire-hosted journal article supplement (https://www.cmaj.ca/highwire/filestream/74363/field_highwire_adjunct_files/0/infographic-AHS-final-web.pdf)
Supplement: infographic-AHS-final-web.pdf [file infographic-AHS-final-web.pdf]

Enabling health system improvement

**Embedded within Alberta's province-wide integrated health care system, Strategic Clinical Networks™ (SCNs™) are:**

### COLLABORATIVE

multistakeholder teams of clinicians, patients, health leaders, community partners, and others.

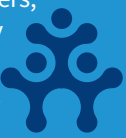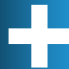

### FOCUSED

on specific areas of health.

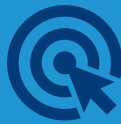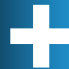

### PROVINCIAL

teams work together across geographical, organizational and institutional boundaries.

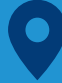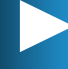

**GET EVIDENCE INTO CARE**

**SOLVE HEALTH CHALLENGES**

**IMPROVE OUTCOMES, QUALITY, SAFETY AND VALUE**

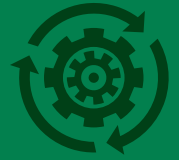

**GUIDED** by evidence, data, patients' and families' experiences, clinical knowledge, strategic health priorities.

## 10 YEARS OF HEALTH SYSTEM INNOVATION

### 2009

Formation of Alberta Health Services, Canada's first province-wide, health system. It now serves 4.3 million people.

### 2012–2019

16 SCNs operating across the province. Examples include:

- Population, Public and Indigenous Health
- Surgery
- Cardiovascular Health and Stroke
- Digestive Health
- Cancer
- Addiction and Mental Health

### COLLECTIVE IMPACT

- ✓ Tackle issues that matter
- ✓ Rigorously test health innovations
- ✓ Advance initiatives that improve health and patients' experiences
- ✓ Improve health service delivery and utilization
- ✓ Spread and sustain improvements on a provincial scale

### VALUE OF NETWORKS

- ✓ Integrated
- ✓ Evidence based
- ✓ Strategic
- ✓ Transformative

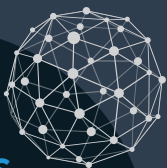

## POSITIVE RETURN ON INVESTMENT FOR ALL ALBERTANS\*

**Every \$1 invested** in SCN activities produced **\$1.54 in savings**

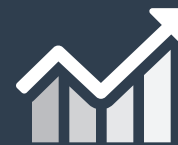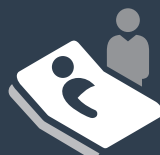

**143 856** hospital bed-days avoided

**\$62.5 M** in net health system savings (e.g., costs avoided)

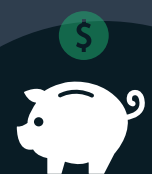

\*Interim analysis based on 15 SCN projects completed between 2012 and 2018.
